# Supplementary material for: Mesenchymal stem cells exert renoprotection via extracellular vesicle-mediated modulation of M2 macrophages and spleen-kidney network
Source: PubMed Central journal article supplement (PMC9334610; doi:10.1038/s42003-022-03712-2), 2022-07-28
Supplement: 42003_2022_3712_MOESM2_ESM.pdf [file 42003_2022_3712_MOESM2_ESM.pdf]

Negative marker of ASCs

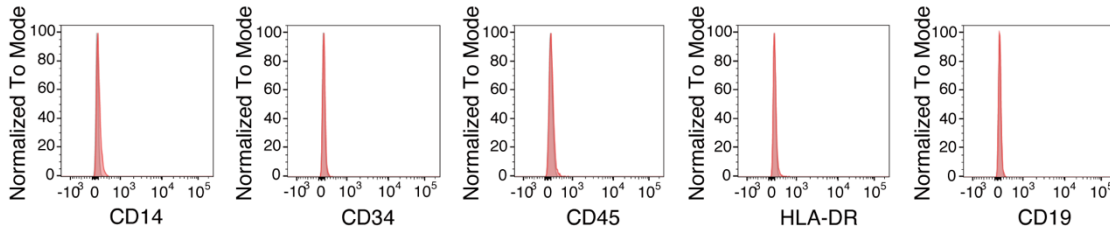

Positive marker of ASCs

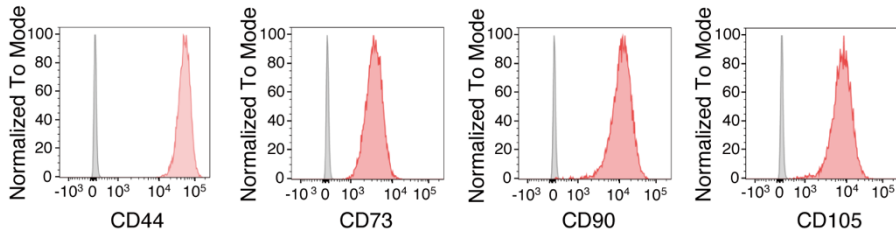

**Supplementary Figure 1. Expression analysis of typical cell surface markers on ASCs.**

ASCs were negative for the antigens CD14, CD34, CD45, HLA-DR, and CD19 but positive for the antigens CD44, CD73, CD90, and CD105.

Supplementary Figure 2

a

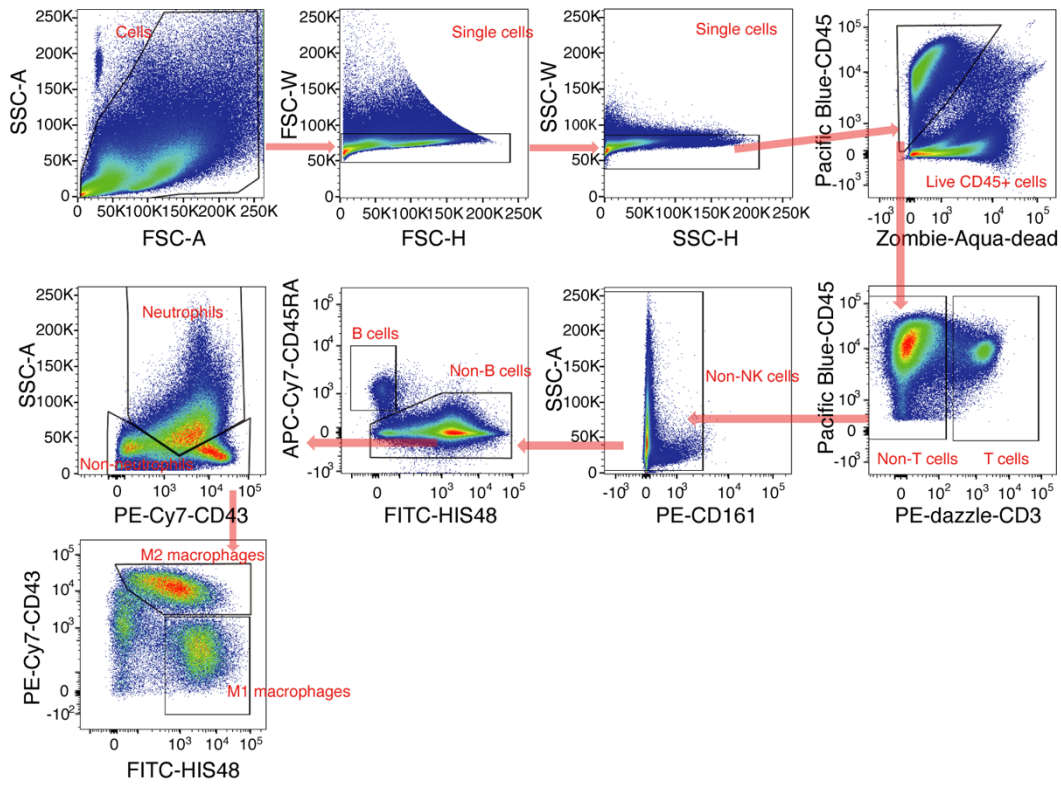

b

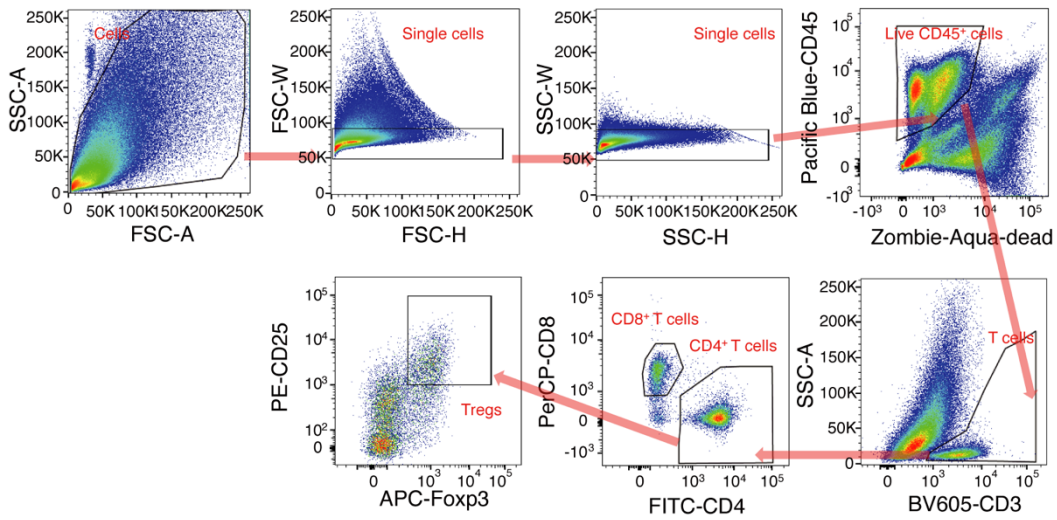

c

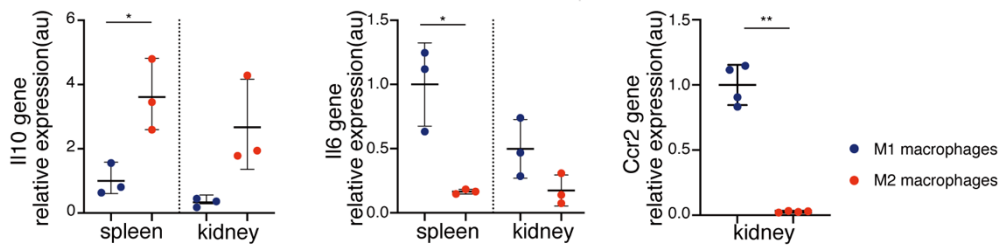

**Supplementary Figure 2. Flow cytometric panels for leukocyte subsets.**

(a) Gating strategy used for flow cytometric analysis of neutrophils, M1 macrophages, M2 macrophages, and B cells. (b) Gating strategy used for flow cytometric analysis of CD4<sup>+</sup> T cells, CD8<sup>+</sup> T cells, and Tregs. (c) mRNA expression levels of IL-10 and IL-6 in M1 and M2 macrophages in the spleen and kidney (n=3 per group), and mRNA expression of CCR2 in M1 and M2 macrophages in the kidney (n=4 per group). All data are shown as mean  $\pm$  SD. \*p  $\leq$  0.05, \*\*p  $\leq$  0.01 as determined by Welch's t-test.

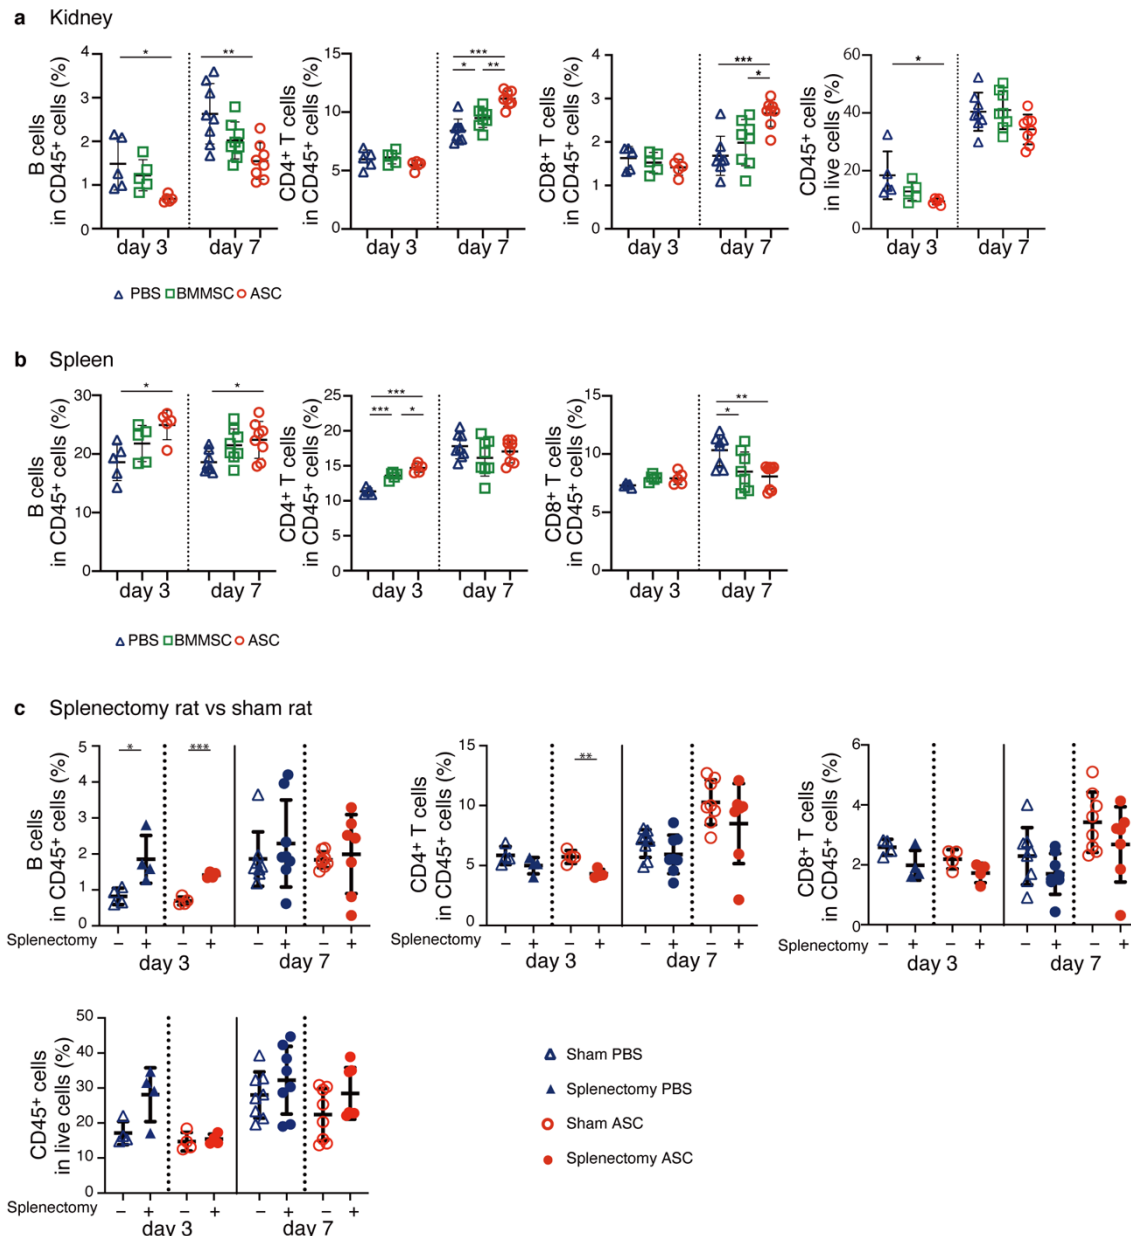

### Supplementary Figure 3. Flow cytometric analysis of leukocyte subsets.

(a) Frequency of B cells, CD4<sup>+</sup> T cells, CD8<sup>+</sup> T cells in CD45<sup>+</sup> cells, and CD45<sup>+</sup> cells in live cells in the kidney 3 and 7 days after nephritis induction (day 3, n=5 per group; day 7, n=8 per group). \* $p \leq 0.05$ , \*\* $p \leq 0.01$ , \*\*\* $p \leq 0.001$  as determined by ANOVA. (b) Frequency of B cells, CD4<sup>+</sup> T cells, and CD8<sup>+</sup> T cells in CD45<sup>+</sup> cells in the spleen 3 and 7 days after nephritis induction (day 3, n=5 per group; day 7, n=8 per group). \* $p \leq 0.05$ , \*\* $p \leq 0.01$ , \*\*\* $p \leq 0.001$  as determined by ANOVA. (c) Alterations in the percentage of B cells, CD4<sup>+</sup> T cells, CD8<sup>+</sup> T cells in CD45<sup>+</sup> cells, and CD45<sup>+</sup> cells in live cells induced by splenectomy with and without ASC treatment for nephritis (day 3, n=4 per group; day 7, n=7-8 per group). All data are shown as mean  $\pm$  SD. \* $p \leq 0.05$ , \*\* $p \leq 0.01$ , \*\*\* $p \leq 0.001$  as determined by Welch's t-test.

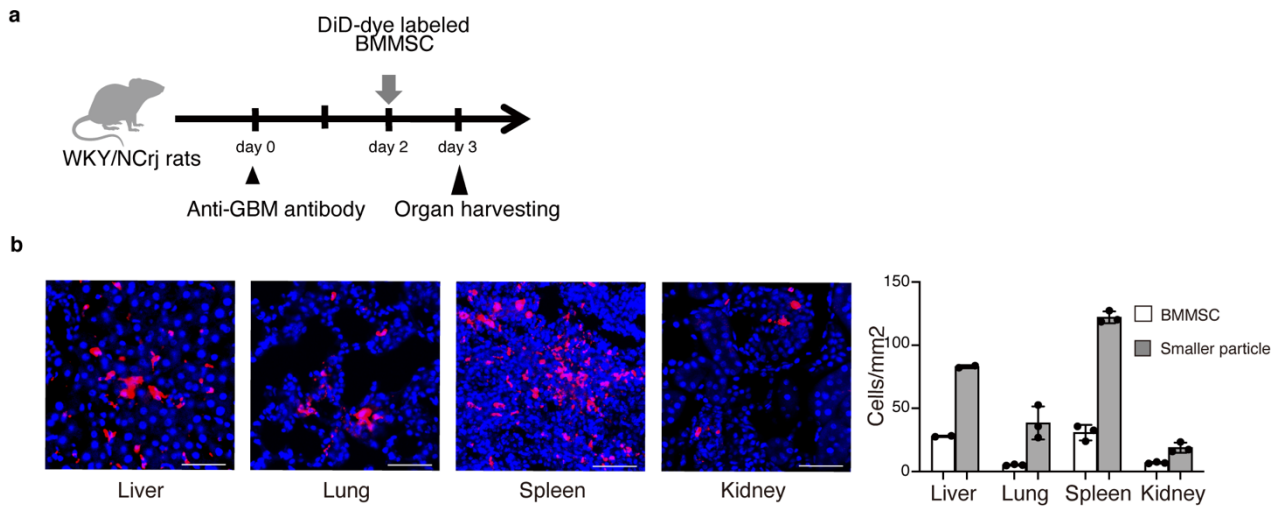

**Supplementary Figure 4. DiD-positive cells were abundant in the lungs and spleen after DiD-labeled BMMSC administration.**

(a) Experimental scheme for analyzing BMMSC distribution. DiD dye-labeled BMMSCs were administered to rats with nephritis on day 2. Tissues were harvested on day 3. (b) Number of DiD-positive cells with large DiD dye particles and small particles in the liver, lung, spleen, and kidney were counted. (Liver: n=2; lung, spleen, and kidney: n=3). All data are shown as mean  $\pm$  SD. Scale bars, 100  $\mu$ m.

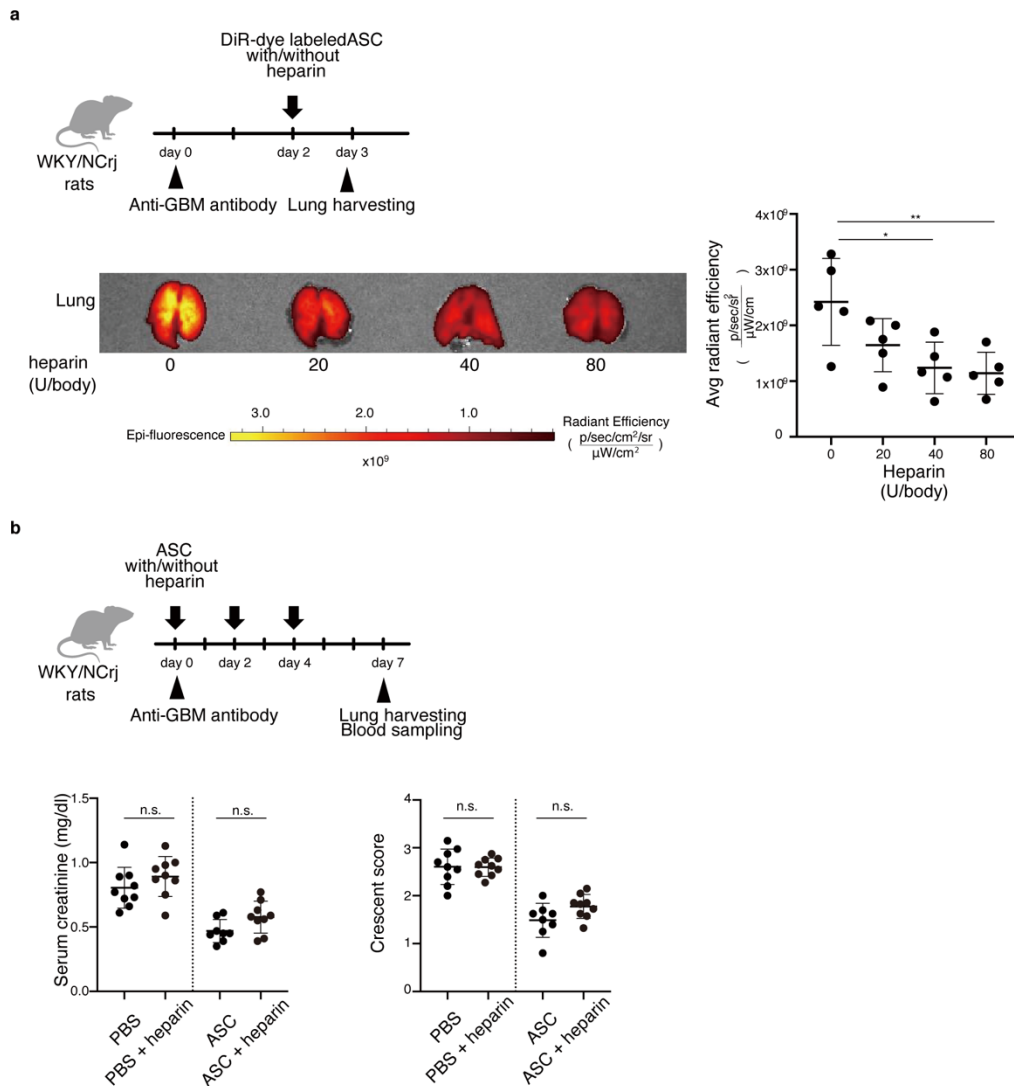

**Supplementary Figure 5. Impact of the reduction of ASC accumulation in the lung on treatment efficacy.**

(a) Experimental scheme for IVIS imaging analysis. DiR dye-labeled human ASCs were administered to nephritis-induced WKY/NCrj rats on day 2 with and without heparin. IVIS observation was performed on day 3. The accumulation of ASCs in the lungs was decreased by using heparin in a dose-dependent manner ( $n=5$  per group). (b) Experimental scheme for ASC treatment with or without heparin. The therapeutic potential of ASCs was not canceled by decreasing the accumulation of ASCs in the lungs ( $n=8-9$  per group). All data are shown as mean  $\pm$  SD. \* $p \leq 0.05$ , \*\* $p \leq 0.01$ , as determined by ANOVA.

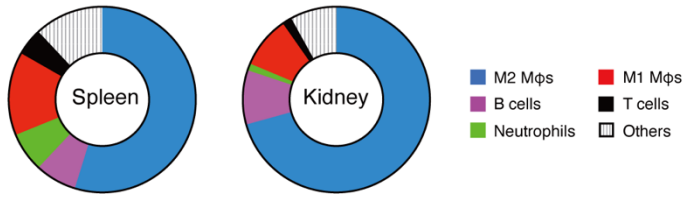

**Supplementary Figure 6. The proportion of each subset in DiD<sup>+</sup> leucocytes.**

Pie charts show the proportion of each subset in DiD<sup>+</sup> leucocytes in the spleen and the kidney 4 hours after the venous injection of DiD-labeled ASCs (n=6 per group).

## Supplementary Table 1. Summary of MSigDB gene set enrichment analysis

| Term                                      | K    | DEG_group_1 |          | DEG_group_2 |    | DEG_group_3 |             | DEG_group_4 |          | DEG_group_5 |    | DEG_group_6 |             | DEG_group_7 |          |             |          |          |          |    |          |          |    |    |
|-------------------------------------------|------|-------------|----------|-------------|----|-------------|-------------|-------------|----------|-------------|----|-------------|-------------|-------------|----------|-------------|----------|----------|----------|----|----------|----------|----|----|
|                                           |      | k           | p_value  | FDR_q_value | k  | p_value     | FDR_q_value | k           | p_value  | FDR_q_value | k  | p_value     | FDR_q_value | k           | p_value  | FDR_q_value |          |          |          |    |          |          |    |    |
| HALLMARK_GLYCOLYSIS                       | 200  | 4           | 0.00431  | 0.0239      | 8  | 6.69E-07    | 1.11E-05    | NA          | NA       | NA          | 3  | 0.00759     | 0.0237      | 4           | 0.00279  | 0.00734     | NA       | NA       | NA       |    |          |          |    |    |
| HALLMARK_MTORC1_SIGNALING                 | 200  | 4           | 0.00431  | 0.0239      | 9  | 4.81E-08    | 2.40E-06    | NA          | NA       | NA          | 3  | 0.00759     | 0.0237      | NA          | NA       | NA          | 3        | 0.00567  | 0.0258   |    |          |          |    |    |
| HALLMARK_KRAS_SIGNALING_UP                | 200  | NA          | NA       | NA          | 4  | 0.00587     | 0.0183      | 8           | 3.31E-08 | 1.65E-06    | NA | NA          | NA          | NA          | 6        | 2.70E-05    | 0.000112 | NA       | NA       | NA |          |          |    |    |
| HALLMARK_P53_PATHWAY                      | 200  | NA          | NA       | NA          | 5  | 0.00078     | 0.00392     | 3           | 0.0128   | 0.0427      | 9  | 5.10E-08    | 1.28E-06    | 3           | 0.00759  | 0.0237      | 9        | 7.72E-09 | 5.51E-08 | NA | NA       | NA       |    |    |
| HALLMARK_INTERFERON_ALPHA_RESPONSE        | 200  | NA          | NA       | NA          | NA | NA          | NA          | NA          | NA       | NA          | 4  | 0.00043     | 0.00305     | 6           | 4.47E-08 | 1.12E-06    | 5        | 9.71E-06 | 4.86E-05 | NA | NA       | NA       |    |    |
| HALLMARK_INTERFERON_GAMMA_RESPONSE        | 200  | NA          | NA       | NA          | NA | NA          | NA          | 4           | 0.00145  | 0.0145      | 7  | 8.57E-06    | 0.000143    | 7           | 1.62E-07 | 2.70E-06    | 11       | 1.81E-11 | 2.26E-10 | 5  | 3.14E-05 | 0.000393 |    |    |
| HALLMARK_TNFA_SIGNALING_VIA_NFKB          | 200  | NA          | NA       | NA          | NA | NA          | NA          | 4           | 0.00145  | 0.0145      | 14 | 2.10E-14    | 1.05E-12    | 8           | 7.13E-09 | 3.57E-07    | 32       | 4.47E-47 | 2.24E-45 | NA | NA       | NA       |    |    |
| HALLMARK_INFLAMMATORY_RESPONSE            | 200  | 6           | 5.34E-05 | 0.00089     | 5  | 0.00078     | 0.00392     | 3           | 0.0128   | 0.0427      | 4  | 0.00601     | 0.0177      | 3           | 0.00759  | 0.0237      | 13       | 2.82E-14 | 7.06E-13 | 4  | 0.00048  | 0.00339  |    |    |
| GO_SECRETION                              | 1618 | 28          | 3.77E-13 | 2.85E-09    | 24 | 3.28E-09    | 2.26E-06    | 21          | 2.49E-10 | 1.89E-06    | NA | NA          | NA          | NA          | NA       | NA          | NA       | NA       | NA       | NA | NA       | NA       |    |    |
| GO_EXOCYTOSIS                             | 914  | 21          | 2.60E-12 | 6.56E-09    | 21 | 1.47E-11    | 1.24E-08    | 11          | 1.37E-05 | 0.00266     | NA | NA          | NA          | NA          | NA       | NA          | NA       | NA       | NA       | 11 | 6.97E-07 | 0.000132 |    |    |
| GO_MYELOID_LEUKOCYTE_ACTIVATION           | 662  | 15          | 5.20E-09 | 7.88E-06    | 23 | 2.48E-16    | 1.88E-12    | 10          | 4.90E-06 | 0.00137     | NA | NA          | NA          | NA          | NA       | NA          | NA       | NA       | NA       | NA | NA       | NA       |    |    |
| GO_ORGANIC_ACID_METABOLIC_PROCESS         | 1183 | NA          | NA       | NA          | 26 | 1.14E-13    | 2.82E-10    | NA          | NA       | NA          | NA | NA          | NA          | NA          | NA       | NA          | NA       | NA       | NA       | NA | NA       | NA       | NA |    |
| GO_ORGANIC_ACID_BIOSYNTHETIC_PROCESS      | 368  | NA          | NA       | NA          | 14 | 7.24E-11    | 5.48E-08    | NA          | NA       | NA          | NA | NA          | NA          | NA          | NA       | NA          | NA       | NA       | NA       | NA | NA       | NA       | NA |    |
| GO_RIBOSOME_BIOGENESIS                    | 310  | NA          | NA       | NA          | NA | NA          | NA          | NA          | NA       | NA          | 14 | 8.20E-12    | 1.77E-09    | NA          | NA       | NA          | NA       | NA       | NA       | NA | NA       | NA       | NA | NA |
| GO_CYTOPLASMIC_TRANSLATION                | 103  | NA          | NA       | NA          | NA | NA          | NA          | NA          | NA       | NA          | 11 | 1.32E-13    | 3.22E-11    | NA          | NA       | NA          | NA       | NA       | NA       | NA | NA       | NA       | NA | NA |
| GO_PROTEIN_TARGETING_TO_MEMBRANE          | 207  | NA          | NA       | NA          | NA | NA          | NA          | NA          | NA       | NA          | 24 | 2.59E-29    | 2.45E-26    | NA          | NA       | NA          | NA       | NA       | NA       | NA | NA       | NA       | NA | NA |
| GO_APOPTOTIC_PROCESS                      | 1994 | NA          | NA       | NA          | 21 | 8.66E-06    | 0.00179     | NA          | NA       | NA          | 31 | 4.02E-12    | 9.22E-10    | 16          | 1.74E-06 | 0.000286    | 28       | 2.29E-12 | 1.02E-09 | 17 | 6.54E-08 | 1.90E-05 |    |    |
| GO_RESPONSE_TO_BIOTIC_STIMULUS            | 1615 | NA          | NA       | NA          | NA | NA          | NA          | 20          | 1.60E-09 | 6.05E-06    | NA | NA          | NA          | 23          | 5.39E-14 | 4.08E-10    | 24       | 3.54E-11 | 7.25E-09 | 17 | 2.97E-09 | 1.41E-06 |    |    |
| GO_RESPONSE_TO_TYPE_I_INTERFERON          | 99   | NA          | NA       | NA          | NA | NA          | NA          | NA          | NA       | NA          | 7  | 1.24E-09    | 1.57E-06    | NA          | NA       | NA          | NA       | NA       | NA       | NA | NA       | NA       | NA | NA |
| GO_RESPONSE_TO_OXYGEN_CONTAINING_COMPOUND | 1714 | NA          | NA       | NA          | NA | NA          | NA          | NA          | NA       | NA          | NA | NA          | NA          | 15          | 1.33E-06 | 0.000241    | 32       | 1.41E-17 | 5.36E-14 | NA | NA       | NA       | NA | NA |
| GO_REGULATION_OF_IMMUNE_SYSTEM_PROCESS    | 1637 | NA          | NA       | NA          | 21 | 3.82E-07    | 0.000165    | 15          | 9.15E-06 | 0.00213     | 27 | 3.28E-11    | 6.38E-09    | NA          | NA       | NA          | 28       | 1.93E-14 | 3.65E-11 | 19 | 5.52E-11 | 4.64E-08 |    |    |
| GO_CYTOKINE_MEDIATED_SIGNALING_PATHWAY    | 807  | NA          | NA       | NA          | NA | NA          | NA          | 11          | 4.26E-06 | 0.00124     | NA | NA          | NA          | 13          | 7.42E-09 | 6.25E-06    | 20       | 2.19E-13 | 2.08E-10 | NA | NA       | NA       | NA | NA |

K: number of genes in each gene set; k: number of genes in overlap. Results with FDR q-value < 0.05 are only shown.



**Supplementary Table 2. List of antibodies and dyes used in histological staining**

| Primary antibodies                           |                     |                 |         |                   |
|----------------------------------------------|---------------------|-----------------|---------|-------------------|
|                                              | Supplier            | Conjugated      | Cat. #  | Incubation        |
| CD11b/c                                      | Abcam               | N/A             | ab 1211 | 10ug/ml, 1h, RT   |
| CD45                                         | Biolegend           | Pacific Blue    | 202226  | 2 in 100, 1h, RT  |
| CD45                                         | Biolegend           | FITC            | 202205  | 4 in 100, 1h, RT  |
| CD68                                         | BMA Biomedicals     | N/A             | T-3003  | 0.5 in 100, 1h RT |
| Secondary antibodies                         |                     |                 |         |                   |
|                                              | supplier            | Conjugated      | Cat. #  |                   |
| Histofine® Simple Stain™ MAX PO (M)          | NICHIREI BIOSCIENCE | Peroxidase      | 424132  | 1h, RT            |
| Fluorescein/Oregon Green Polyclonal antibody | Thermo fisher       | Alexa Fluor 488 | A-11096 | 0.5 in 100, 1h RT |
| FITC-conjugated                              |                     |                 |         |                   |
| Dye                                          |                     |                 |         |                   |
|                                              | Supplier            |                 | Cat. #  |                   |
| Simple stain DAB solution                    | NICHIREI BIOSCIENCE |                 | 415172  | 5-10min, RT       |

### Supplementary Table 3. List of antibodies and dyes used in flowcytometry analysis

#### A. List of antibodies used for staining ASCs

| Antibody        | Conjugated | Supplier   | Clone    | Dilution | Laser       | Filter | Cat. #  |
|-----------------|------------|------------|----------|----------|-------------|--------|---------|
| Negative marker |            |            |          |          |             |        |         |
| CD14            | FITC       | BD         | M5E2     | 1 in 5   | Blue(488nm) | 530/30 | 555397  |
| CD34            | PE         | Santa Cruz | ICO115   | 1 in 5   | Blue(488nm) | 575/25 | sc-7324 |
| CD45            | APC-Fire   | Biologend  | HI30     | 1 in 20  | Red(633nm)  | 780/60 | 304062  |
| HLA-DR          | APC        | Biologend  | L243     | 1 in 20  | Red(633nm)  | 660/20 | 307610  |
| CD19            | FITC       | Biologend  | 4G7      | 1 in 20  | Blue(488nm) | 530/30 | 392508  |
| Positive marker |            |            |          |          |             |        |         |
| CD44            | PE         | Biologend  | IM7      | 1 in 80  | Blue(488nm) | 575/25 | 103007  |
| CD73            | FITC       | Biologend  | AD2      | 1 in 20  | Blue(488nm) | 530/30 | 344016  |
| CD90            | FITC       | Biologend  | 5.00E+10 | 1 in 20  | Blue(488nm) | 530/30 | 328108  |
| CD105           | PE         | BD         | 266      | 1 in 20  | Blue(488nm) | 575/25 | 560839  |

#### B. Panel for myeloid cells and B cell analysis

| Antibody  | Conjugated             | Supplier      | Clone   | Dilution | Laser         | Filter | Cat. #     |
|-----------|------------------------|---------------|---------|----------|---------------|--------|------------|
| Biotin    | PE-dazzle streptavidin | Biologend     |         | 1 in 200 | Blue(488nm)   | 610/20 | 405248     |
| CD45RA    | APC-Cy7                | BD            | OX-33   | 1 in 50  | Red(633nm)    | 780/60 | 561624     |
| CD161     | PE                     | Biologend     | 3.2.3.  | 1 in 50  | Blue(488nm)   | 575/25 | 205604     |
| CD3       | Biotin                 | Thermo fisher | G4.18   | 1 in 50  |               |        | 13-0030-82 |
| CD32      | N/A                    | BD            | D34-485 | 1 in 50  |               |        | 550271     |
| CD43      | PE-Cy7                 | Biologend     | W3/13   | 1 in 50  | Blue(488nm)   | 780/60 | 202816     |
| CD45      | Pacific Blue           | Biologend     | OX-1    | 1 in 50  | Violet(405nm) | 450/50 | 202226     |
| HIS48     | FITC                   | Thermo fisher | HIS48   | 1 in 50  | Blue(488nm)   | 530/30 | 11-0570-82 |
| Live-dead | Zombie Aqua            | Biologend     |         | 1 in 100 | Violet(405nm) | 525/50 | 423102     |

#### C. Panel for T cell analysis

| Antibody | Conjugated   | Supplier  | Clone   | Dilution | Laser         | Filter | Cat. #     |
|----------|--------------|-----------|---------|----------|---------------|--------|------------|
| CD25     | PE           | Biologend | OX-39   | 1 in 100 | Blue(488nm)   | 575/25 | 12-0390-82 |
| CD3      | BV605        | BD        | 1F4     | 1 in 50  | Violet(405nm) | 610/20 | 563949     |
| CD32     | N/A          | BD        | D34-485 | 1 in 50  |               |        | 550271     |
| CD4      | FITC         | Biologend | OX-35   | 1 in 100 | Blue(488nm)   | 530/30 | 203305     |
| CD45     | Pacific Blue | Biologend | OX-1    | 1 in 50  | Violet(405nm) | 450/50 | 202226     |
| CD8a     | PerCP        | Biologend | OX8     | 1 in 25  | Blue(488nm)   | 660/20 | 201712     |
| Foxp3    | APC          | Biologend | FJK16-s | 1 in 50  | Red(633nm)    | 660/20 | 17-5773-   |

|           |             |           |  |          |               |        |        |
|-----------|-------------|-----------|--|----------|---------------|--------|--------|
|           |             |           |  |          |               |        | 82     |
| Live-dead | Zombie Aqua | Biolegend |  | 1 in 100 | Violet(405nm) | 525/60 | 423102 |

D. Panel for Ki 67 analysis in Tregs

| Antibody  | Conjugated   | Supplier      | Clone   | Dilution | Laser         | Filter | Cat. #     |
|-----------|--------------|---------------|---------|----------|---------------|--------|------------|
| CD25      | PE           | Biolegend     | OX-39   | 1 in 100 | Blue(488nm)   | 575/25 | 12-0390-82 |
| CD3       | BV605        | BD            | 1F4     | 1 in 50  | Violet(405nm) | 610/20 | 563949     |
| CD32      | N/A          | BD            | D34-485 | 1 in 50  |               |        | 550271     |
| CD4       | PE-Cy7       | Biolegend     | W3/25   | 1 in100  | Blue(488nm)   | 780/60 | 201516     |
| CD45      | Pacific Blue | Biolegend     | OX-1    | 1 in 50  | Violet(405nm) | 450/50 | 202226     |
| CD8a      | PerCP        | Biolegend     | OX8     | 1 in 25  | Blue(488nm)   | 660/20 | 201712     |
| Foxp3     | APC          | Biolegend     | FJK16-s | 1 in 50  | Red(633nm)    | 660/20 | 17-5773-82 |
| Ki67      | FITC         | Thermo fisher | SoLA15  | 1 in 100 | Blue(488nm)   | 530/30 | 2040334    |
| Live-dead | Zombie Aqua  | Biolegend     |         | 1 in 100 | Violet(405nm) | 525/60 | 423102     |

E. Panel for CD45+ CD11b/c+ DiD+ cells subset sorting from spleen

| Antibody | Conjugated   | Supplier  | Clone   | Dilution | Laser         | Filter | Cat. # |
|----------|--------------|-----------|---------|----------|---------------|--------|--------|
| CD11b/c  | FITC         | Biolegend | OX-42   | 1 in 200 | Blue(488nm)   | 530/30 | 201805 |
| CD32     | N/A          | BD        | D34-485 | 1 in 50  |               |        | 550271 |
| CD45     | Pacific Blue | Biolegend | OX-1    | 1 in 50  | Violet(405nm) | 450/50 | 202226 |

F. Panel for M1 and M2 macrophage subsets sorting

| Antibody  | Conjugated   | Supplier      | Clone   | Dilution | Laser         | Filter | Cat. #     |
|-----------|--------------|---------------|---------|----------|---------------|--------|------------|
| Biotin    | CD11b/c      | Biolegend     | OX-12   | 1 in 100 |               |        | 201803     |
| CD3       | BV605        | BD            | 1F4     | 1 in 50  | Violet(405nm) | 610/20 | 563949     |
| CD32      | N/A          | BD            | D34-485 | 1 in 50  |               |        | 550271     |
| CD45      | Pacific Blue | Biolegend     | OX-1    | 1 in 50  | Violet(405nm) | 450/50 | 202226     |
| HIS48     | FITC         | Thermo fisher | HIS48   | 1 in 50  | Blue(488nm)   | 530/30 | 11-0570-82 |
| Live-dead | Zombie Aqua  | Biolegend     |         | 1 in 100 | Violet(405nm) | 525/50 | 423102     |

G. Panel for CD4+ T cell sorting from tibia

| Antibody  | Conjugated   | Supplier  | Clone   | Dilution | Laser         | Filter | Cat. # |
|-----------|--------------|-----------|---------|----------|---------------|--------|--------|
| CD3       | BV605        | BD        | 1F4     | 1 in 50  | Violet(405nm) | 610/20 | 563949 |
| CD32      | N/A          | BD        | D34-485 | 1 in 50  |               |        | 550271 |
| CD45      | Pacific Blue | Biolegend | OX-1    | 1 in 50  | Violet(405nm) | 450/50 | 202226 |
| Live-dead | Zombie Aqua  | Biolegend |         | 1 in 100 | Violet(405nm) | 525/50 | 423102 |

**Supplementary Table 4. List of primers used to detect mRNAs**

|               |    |                          |
|---------------|----|--------------------------|
| Rps18         | Fw | AAGTTTCAGCACATCCTGCGAGTA |
|               | Rv | TTGGTGAGGTCAATGTCTGCTTTC |
| IL-10         | Fw | CAGACCCACATGCTCCGAGA     |
|               | Rv | CAAGGCTTGGCAACCCAAGTA    |
| TGF $\beta$ 1 | Fw | CATTGCTGTCCCGTGCAGA      |
|               | Rv | AGGTAACGCCAGGAATTGTTGCTA |
| IL-6          | Fw | ATTGTATGAACAGCGATGATGCAC |
|               | Rv | CCAGGTAGAAACGGAACTCCAGA  |
| TNF $\alpha$  | Fw | TTCCAATGGGCTTTCGGAAC     |
|               | Rv | AGACATCTTCAGCAGCCTTGTGAG |
| Ccr2          | Fw | TGTGAGGCTCATCTTTGCCATC   |
|               | Rv | CACCTGCATGGCCTGGTCTA     |

Fw, forward ; Rv, reverse
