# Supplementary material for: Mesenchymal stem cells exert renoprotection via extracellular vesicle-mediated modulation of M2 macrophages and spleen-kidney network
Source: PubMed Central journal article supplement (PMC9334610; doi:10.1038/s42003-022-03712-2), 2022-07-28
Supplement: 42003_2022_3712_MOESM3_ESM.pdf [file 42003_2022_3712_MOESM3_ESM.pdf]

## Description of Additional Supplementary Files

**File name:** Supplementary Data

**Description:** The source data underlying most graphs and charts used in this manuscript.

**File name:** Supplementary Movie 1

**Description:** The coculture of DiD labeled ASC and macrophages.

**File name:** Supplementary Movie 2

**Description:** The behavior of EV+ leukocytes in spleen.
